# Supplementary material for: Mutations in the satellite cell gene MEGF10 cause a recessive congenital myopathy with minicores
Source: PubMed Central journal article supplement (PMC3332380; doi:10.1007/s10048-012-0315-z), 2012-02-28
Supplement: 10048_2012_315_MOESM1_ESM.pdf [file 10048_2012_315_MOESM1_ESM.pdf]

## Online Resource 1. Clinical histories and results of physical examinations of affected members of family 1030

| Subject                              | 1030-4                                                                     | 1030-6                                                                           | 1030-1                                                           |
|--------------------------------------|----------------------------------------------------------------------------|----------------------------------------------------------------------------------|------------------------------------------------------------------|
| Gender                               | Female                                                                     | Female                                                                           | Female                                                           |
| Handedness                           | Right                                                                      | Right                                                                            | Right                                                            |
| <b>History</b>                       |                                                                            |                                                                                  |                                                                  |
| Symptoms as infant                   | Hypotonia, poor suck, cleft palate, neck flexor weakness, neck contracture | Neck flexor weakness, neck contracture, febrile seizures at 8 to 23 mos.         | Neck flexor weakness, neck contracture                           |
| Symptoms as child                    | Frequent falling, difficulty running, obesity                              | Frequent falling, slow running, extremity weakness                               | Tendency to fall hard on knees, difficulty ascending stairs      |
| Weakness progression                 | Increased at menarche, then static                                         | Increased at menarche, then static                                               | Increased at menarche, then static                               |
| Serum creatine kinase                | Normal or slightly elevated                                                | 174, 217 U/L (reference 37-173)                                                  | Slightly elevated                                                |
| Age at onset of scoliosis            | Unknown, before 13 yrs.                                                    | 7-8 yrs.                                                                         | 9 yrs.                                                           |
| Scoliosis                            | 72 degrees                                                                 | 34 degrees                                                                       | 32 degrees                                                       |
| Back surgery                         | 14 yrs., fused vertebrae                                                   | 11 yrs., Harrington rods placed                                                  | 10 yrs., hooks and Harrington rods placed                        |
| Age at loss of ambulation            | 15 yrs.                                                                    | 11 yrs., after surgery                                                           | Still ambulatory at 23 yrs.                                      |
| Age at onset of respiratory problems | 11 yrs. (bronchitis and pneumonia)                                         | 11 yrs.                                                                          | 10 yrs.                                                          |
| Respiratory involvement              | Chronic restrictive lung disease                                           | Chronic restrictive lung disease                                                 | Chronic restrictive lung disease                                 |
| Respiratory treatment                | BiPAP at night, supplemental oxygen                                        | BiPAP at night                                                                   | BiPAP at night                                                   |
| Cardiac involvement                  | None                                                                       | None                                                                             | None                                                             |
| Other                                | Acid reflux, head MRI at 12 yrs. showed atrophy of cortical gray matter    | Acid reflux, reflux into nose on Barium swallow test, dysphagia with large pills | Dysphagia with pills, episodes of choking, weakness at upper lip |
| <b>Neuromuscular exam</b>            |                                                                            |                                                                                  |                                                                  |
| Age at examination                   | 28 yrs.                                                                    | 25 yrs.                                                                          | 23 yrs.                                                          |
| Cognitive status                     | Normal, attends college                                                    | Normal, attends college                                                          | Normal, attends college                                          |
| Cleft palate                         | Yes (scar from surgical repair at 3 yrs.)                                  | Midline ridge                                                                    | No                                                               |
| Hypernasal voice                     | Yes                                                                        | Yes                                                                              | Yes                                                              |
| Pupils                               | Equal, round, reactive                                                     | Equal, round, reactive                                                           | Equal, round, reactive                                           |
| Reflexes                             | Mostly absent                                                              | Mostly absent                                                                    | Mostly absent                                                    |
| Extraocular movements                | Intact without nystagmyus                                                  | Intact without nystagmyus                                                        | Intact without nystagmyus                                        |
| Facial weakness                      | Diffuse, moderate                                                          | Diffuse, moderate                                                                | Diffuse, moderate                                                |
| Neck contractures                    | Yes                                                                        | Yes                                                                              | Yes                                                              |
| Elbow contractures                   | 10 degrees                                                                 | 30 degrees                                                                       | 20 degrees                                                       |
| Metacarpophalangeal contractures     | NA                                                                         | Yes (right > left)                                                               | NA                                                               |
| Knee contractures                    | 20 degrees                                                                 | 10/0 degrees (R/L)                                                               | 5 degrees                                                        |
| Heel cord contractures               | -5 degrees                                                                 | 30/20 degrees (R/L), surgery at 12 yrs.                                          | -10/-5 degrees (R/L)                                             |

| Subject                     | 1030-4     | 1030-6     | 1030-1 |
|-----------------------------|------------|------------|--------|
| Neck flexion                | 2          | 0          | 2      |
| Neck extension              | 5          | 5          | 5      |
| First dorsal interosseous   | 4          | 1/2 (R/L)  | 3      |
| Abductor digiti minimi      | 4          | 1/2 (R/L)  | 3      |
| Abductor pollicis brevis    | 4          | 2          | 3      |
| Extensor digitorum communis | 4          | 0/3- (R/L) | 3      |
| Grip                        | 4          | 3          | 3      |
| Wrist extension             | 4          | 0/3 (R/L)  | 4      |
| Wrist flexion               | 5          | 5/4 (R/L)  | 5      |
| Biceps                      | 4          | 3          | 3+     |
| Triceps                     | 4          | 2          | 3+     |
| Deltoids                    | 4          | 3-         | 3+     |
| Extensor hallucis longus    | 0          | 2          | 3      |
| Tibialis anterior           | 3          | 2          | 3      |
| Peroneus longus and brevis  | 3          | 2          | 3      |
| Gastrocnemius               | 5          | 5          | 5      |
| Tibialis posterior          | 5          | 5          | 5      |
| Quadriceps                  | 5/4- (R/L) | 3          | 5      |
| Hamstrings                  | 4          | 3          | 3      |
| Iliopsoas (sitting up)      | 4          | 2          | 3      |

Strength tests are out of a maximum of 5, on the Medical Research Council scale. Abbreviations are as follows: mos., months; yrs., years; BiPAP, bilevel positive airway pressure ventilation; MRI, magnetic resonance imaging; R/L, right/left.
