# Supplementary material for: Mutations in the satellite cell gene MEGF10 cause a recessive congenital myopathy with minicores
Source: PubMed Central journal article supplement (PMC3332380; doi:10.1007/s10048-012-0315-z), 2012-02-28
Supplement: 10048_2012_315_MOESM3_ESM.pdf [file 10048_2012_315_MOESM3_ESM.pdf]

**Online Resource 3. Intervals achieving a positive LOD score in genomewide linkage scan of family 1030**

| Peak | Chromosome | Left flanking marker | Right flanking marker | Left boundary location | Right boundary location | Maximum LOD score |
|------|------------|----------------------|-----------------------|------------------------|-------------------------|-------------------|
| 1    | 3          | pter                 | rs1391931             | 1                      | 2935083                 | 1.321             |
| 2    | 3          | rs727476             | rs1995758             | 60316417               | 62091142                | 1.329             |
| 3    | 5          | rs727432             | rs294479              | 7663078                | 58848981                | 1.329             |
| 4    | 5          | rs1490996            | rs2116800             | 124946532              | 145795417               | 1.329             |
| 5    | 6          | rs4110877            | qter                  | 151446716              | 171115067               | 1.329             |
| 6    | 7          | rs1387191            | rs1599405             | 154401017              | 155687803               | 0.01              |
| 7    | 8          | rs1823668            | rs950043              | 1143494                | 5268368                 | 1.329             |
| 8    | 8          | rs1074411            | rs1499364             | 128450221              | 129179926               | 0.42              |
| 9    | 11         | rs2349230            | rs939038              | 25680015               | 33976053                | 1.329             |
| 10   | 11         | rs1404501            | rs2077955             | 63284510               | 72209060                | 0.429             |
| 11   | 11         | rs1216518            | rs2078440             | 100359231              | 123797894               | 1.329             |
| 12   | 12         | pter                 | rs727864              | 1                      | 3416399                 | 0.11              |
| 13   | 13         | rs726051             | rs1927724             | 39702998               | 99992312                | 1.329             |
| 14   | 19         | pter                 | rs1384936             | 1                      | 5423643                 | 0.199             |
| 15   | 19         | rs10518254           | rs739453              | 16022000               | 36079936                | 1.329             |
| 16   | 20         | rs2427077            | qter                  | 59893382               | 63025520                | 0.084             |

All physical positions for flanking SNPs are given in NCBI Build 37 coordinates. The 16 linked regions collectively spanned 235.5 Mb of the genome.
