# Supplementary material for: Mutations in the satellite cell gene MEGF10 cause a recessive congenital myopathy with minicores
Source: PubMed Central journal article supplement (PMC3332380; doi:10.1007/s10048-012-0315-z), 2012-02-28
Supplement: 10048_2012_315_MOESM4_ESM.pdf [file 10048_2012_315_MOESM4_ESM.pdf]

## Online Resource 4. Summary statistics of whole genome sequencing of subject 1030-4

|                                      |                 |
|--------------------------------------|-----------------|
| #SOFTWARE_VERSION                    | 1.8.0.23        |
| #FORMAT_VERSION                      | 1.3             |
| #GENOME_REFERENCE                    | NCBI build 37   |
| #DBSNP_BUILD                         | dbSNP build 131 |
| #GENE_ANNOTATIONS                    | NCBI build 37.1 |
|                                      |                 |
| Gross mapping yield (Gb)             | 224.4           |
| SNP Transitions/transversions        | 2.14172         |
| SNP het/hom ratio                    | 1.576893479     |
| INS het/hom ratio                    | 1.319306157     |
| DEL het/hom ratio                    | 1.656088404     |
| SUB het/hom ratio                    | 1.733661457     |
| SNP total count                      | 3330312         |
| INS total count                      | 199202          |
| DEL total count                      | 208476          |
| SUB total count                      | 70735           |
| SNP novel rate                       | 0.0441932       |
| INS novel rate                       | 0.193015        |
| DEL novel rate                       | 0.23182         |
| SUB novel rate                       | 0.303273        |
| Fully called genome fraction         | 0.958889554     |
| Partially called genome fraction     | 0.006667406     |
| No-called genome fraction            | 0.03444304      |
| Synonymous SNP loci                  | 9614            |
| Missense SNP loci                    | 9320            |
| Nonsense SNP loci                    | 85              |
| Nonstop SNP loci                     | 18              |
| Frame-shifting INS loci              | 102             |
| Frame-shifting DEL loci              | 97              |
| Frame-shifting SUB loci              | 24              |
| Frame-preserving INS loci            | 96              |
| Frame-preserving DEL loci            | 107             |
| Frame-preserving SUB loci            | 262             |
| Frame-shifting/preserving ratio      | 0.479569892     |
| Nonsyn/syn SNP ratio                 | 0.969419596     |
| Insertion/deletions ratio            | 0.955515263     |
| Ins+del/SNP ratio                    | 0.122414356     |
| Coding insertion/deletions ratio     | 0.946078431     |
| Coding SNP/all SNP ratio             | 0.006226744     |
| Coding (ins+del)/all (ins+del) ratio | 0.000973808     |

Analysis parameters and summary statistics were provided by Complete Genomics, Inc.
