# Supplementary material for: Mutations in the satellite cell gene MEGF10 cause a recessive congenital myopathy with minicores
Source: PubMed Central journal article supplement (PMC3332380; doi:10.1007/s10048-012-0315-z), 2012-02-28
Supplement: 10048_2012_315_MOESM5_ESM.pdf [file 10048_2012_315_MOESM5_ESM.pdf]

## **Online Resource 5. Sequences of morpholinos injected into zebrafish embryos**

|            |                            |
|------------|----------------------------|
| MO1_i4e5   | ACACGCTGCACAAAGACACAAAGCT  |
| MO2_i5e6   | CACAGCTGCACAGAGACACAAAAC   |
| MO3_e8i8   | TATTTGCAGTGTGTTGTCTCACCTGC |
| MO4_e17i17 | AAAGCTCTTTTCCATACTGACTCGT  |
| COMO       | CCTCTTACCTCAGTTACAATTTATA  |

Morpholino designations are as explained in text.
