# Supplementary material for: Mutations in the satellite cell gene MEGF10 cause a recessive congenital myopathy with minicores
Source: PubMed Central journal article supplement (PMC3332380; doi:10.1007/s10048-012-0315-z), 2012-02-28

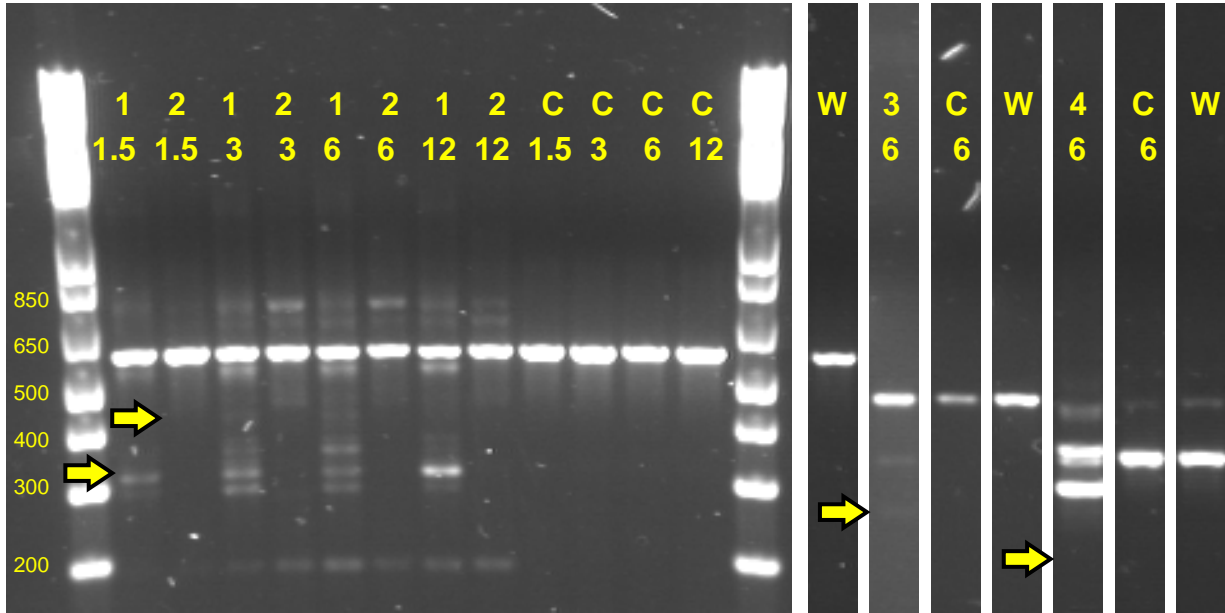

Supplement: 10048_2012_315_MOESM6_ESM.pdf [file 10048_2012_315_MOESM6_ESM.pdf]
