# Supplementary material for: Mutations in the satellite cell gene MEGF10 cause a recessive congenital myopathy with minicores
Source: PubMed Central journal article supplement (PMC3332380; doi:10.1007/s10048-012-0315-z), 2012-02-28

**a**

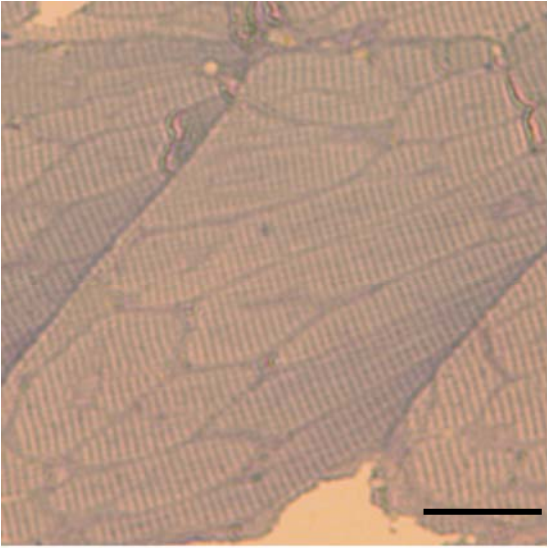

**b**

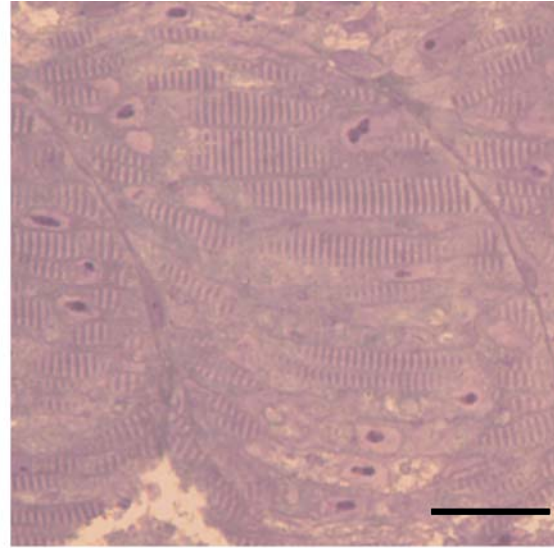

**c**

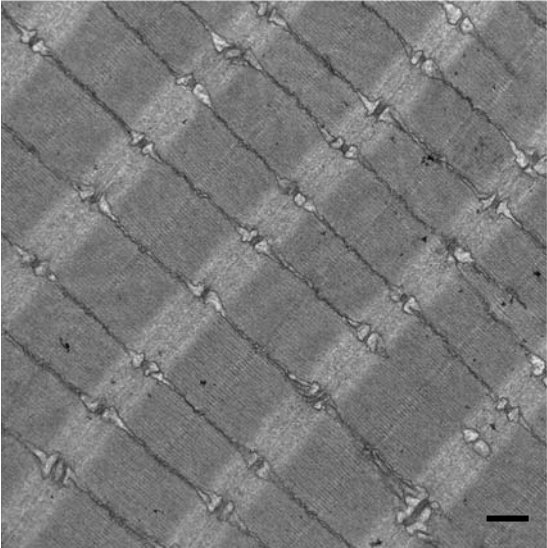

**d**

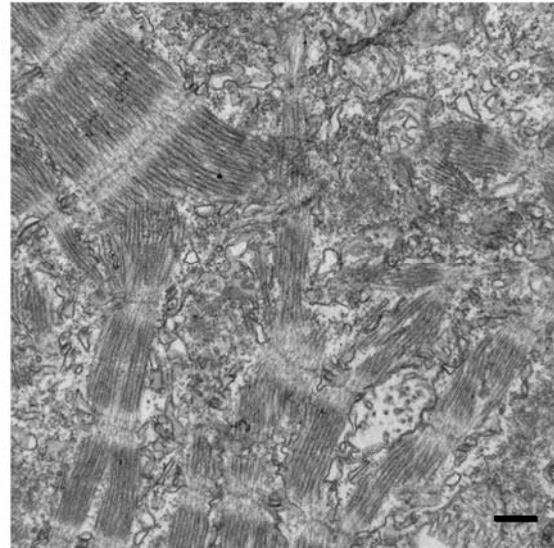

Supplement: 10048_2012_315_MOESM15_ESM.pdf [file 10048_2012_315_MOESM15_ESM.pdf]
